# Supplementary material for: Methane emissions due to reservoir flushing: a significant emission pathway?
Source: Copernicus journal article supplement (doi:10.5194/egusphere-2023-422), 2023-03-13
Supplement: Supplementary file 1 [file egusphere-2023-422-supplement.pdf]

## 1    **Supplementary Figures**

### 2    Supplementary Figure S1

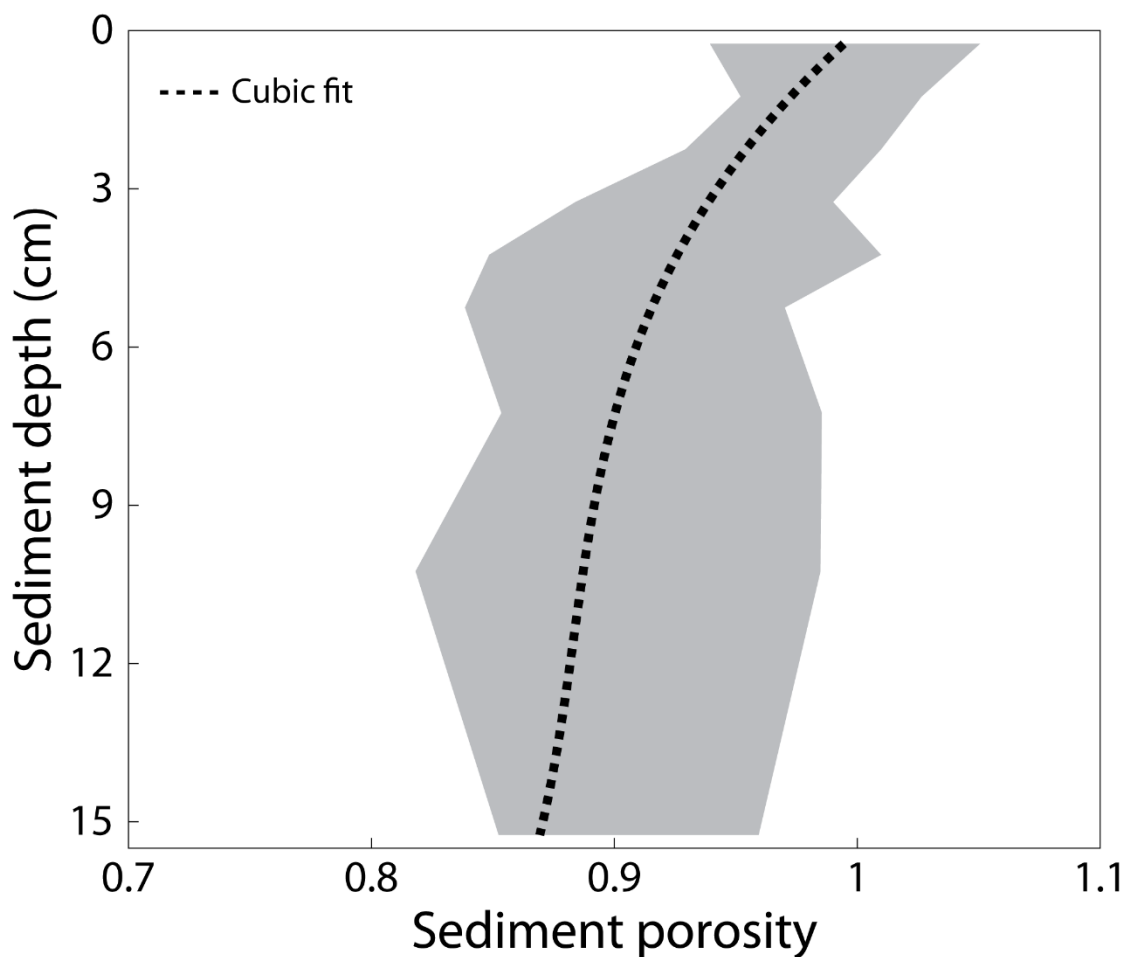

3  
4    Supplementary Figure S1. Cubic fit of sediment porosity versus sediment depth (dotted  
5    line) of all porosity data from sediment profiles across all sampling campaigns. Shaded  
6    areas display the 25<sup>th</sup> and 75<sup>th</sup> percentile.

12 Supplementary Figure S2

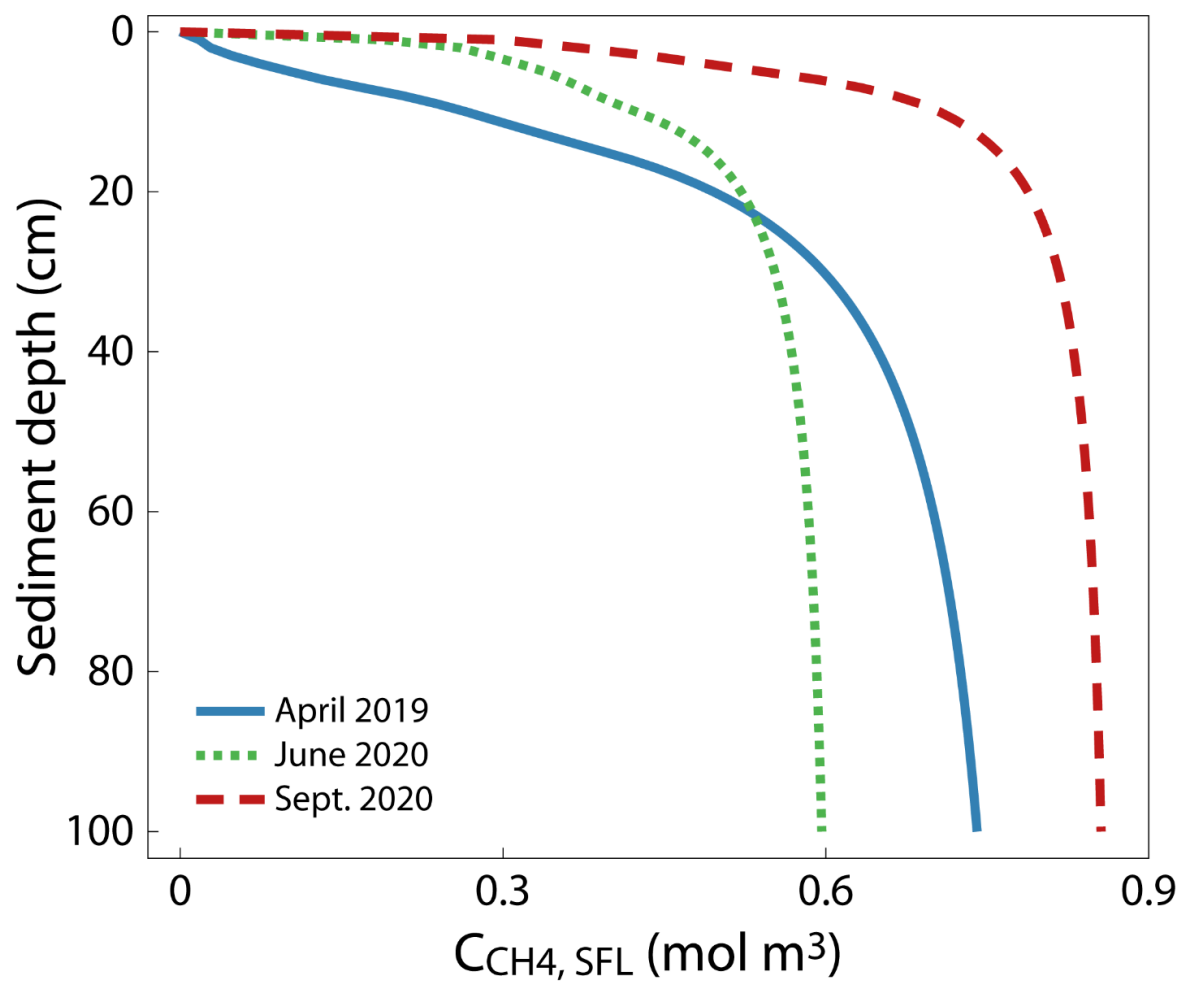

13  
14 Supplementary Figure S2. The average CH<sub>4</sub> concentration in the flushed sediment layer  
15 for a sediment depth down to 100 cm.
